# Supplementary material for: Li5Cs(SO4)3: a potential zero-order wave plate material with short deep-ultraviolet cutoff edge
Source: Royal Society of Chemistry journal article supplement (doi:10.1039/d1nj03883d), 2021-01-01
Supplement: d1nj03883d1.pdf [file d1nj03883d1.pdf]

*Electronic Supplementary Information:*

## **Li<sub>5</sub>Cs(SO<sub>4</sub>)<sub>3</sub>: A Potential Zero-order Wave Plate Material with Short Deep-ultraviolet Cutoff Edge**

Yuchen Yan,<sup>\*a</sup> Yanna Chen,<sup>†b</sup> Bao Jiang,<sup>c</sup> Qun Jing<sup>\*a</sup> and Jun Zhang<sup>\*a</sup>

<sup>a</sup> School of School of Physical Science and Technology, Xinjiang University, Urumqi 830046, Xinjiang, China

<sup>b</sup> School of Chemical Engineering and Technology, Xinjiang University, Urumqi 830046, China

<sup>c</sup> College of Chemistry and Chemical Engineering, Xinjiang Normal University, Urumqi, Xinjiang 830054, China.

\*Corresponding author E-mail: zhj@xju.edu.cn

### **Contents**

**Table S1** Atomic coordinates, equivalent isotropic displacement parameters for Li<sub>5</sub>Cs(SO<sub>4</sub>)<sub>3</sub>. Bond valence sums (BVS) are calculated by using bond-valence theory.

**Table S2** Selected bond lengths (Å) and angles (°) for Li<sub>5</sub>Cs(SO<sub>4</sub>)<sub>3</sub>.

**Table S3** Birefringence and cutoff edge comparison for wave plate.

**Table S4** Comparison of basic information on alkali metal sulfates.

**Figure S1** The coordination environments of cations in the crystal structure of Li<sub>5</sub>Cs(SO<sub>4</sub>)<sub>3</sub>.

**Figure S2** Basic type of S-O group in alkali metal sulfates.

**Table S1** Atomic coordinates ( $\times 10^4$ ), equivalent isotropic displacement parameters ( $\text{\AA}^2 \times 10^3$ ) for  $\text{Li}_5\text{Cs}(\text{SO}_4)_3$ .  $U_{(\text{eq})}$  is defined as one third of the trace of the orthogonalized  $U_{ij}$  tensor. Bond valence sums (BVS) are calculated by using bond-valence theory ( $S_i = \exp[(R_o - R_i)/B]$ , where  $R_o$  is an empirical constant,  $R_i$  is the length of bond  $i$  (in angstroms), and  $B = 0.37$ ).

| Atoms | x         | y       | z       | $U_{(\text{eq})}$ | S.O.F. | BVS  |
|-------|-----------|---------|---------|-------------------|--------|------|
| Cs(1) | 2526(1)   | 5662(1) | 2342(1) | 42(1)             |        | 0.72 |
| Li(1) | 3044(18)  | 7392(6) | 4340(6) | 34(2)             |        | 0.92 |
| Li(2) | -2201(17) | 4323(5) | 631(6)  | 27(2)             |        | 1.18 |
| Li(3) | 1893(16)  | 2863(5) | 1569(5) | 25(2)             |        | 1.15 |
| Li(4) | -2900(15) | 4165(5) | 4412(5) | 20(2)             |        | 1.13 |
| Li(5) | -1998(16) | 8067(5) | 1333(5) | 27(2)             |        | 1.05 |
| S(1)  | -2152(2)  | 6164(1) | 4442(1) | 14(1)             |        | 6.15 |
| S(2)  | -2687(3)  | 6354(1) | 275(1)  | 26(1)             |        | 6.4  |
| S(3)  | 6991(2)   | 3452(1) | 2474(1) | 16(1)             |        | 6.09 |
| O(1)  | -3433(6)  | 6801(2) | 3835(2) | 29(1)             |        | 2.09 |
| O(2)  | -2498(7)  | 5320(2) | 4038(2) | 31(1)             |        | 2.03 |
| O(3)  | -3440(6)  | 6203(2) | 5343(2) | 30(1)             |        | 2.05 |
| O(4)  | 765(6)    | 6364(2) | 4563(2) | 20(1)             |        | 2.02 |
| O(5)  | 8141(6)   | 2720(2) | 1963(2) | 19(1)             |        | 2.02 |
| O(6)  | 4047(6)   | 3323(2) | 2562(2) | 22(1)             |        | 2.09 |
| O(7)  | 8274(6)   | 3480(2) | 3392(2) | 21(1)             |        | 2.07 |
| O(8)  | 7482(7)   | 4248(2) | 1983(2) | 29(1)             |        | 1.99 |
| O(9A) | -1820(30) | 5459(8) | 373(9)  | 68(4)             | 0.5    | /    |
| O(9B) | -2990(30) | 5519(8) | 683(10) | 62(4)             | 0.5    | /    |
| O(10) | -5437(8)  | 6559(2) | -56(3)  | 47(1)             |        | 2.04 |
| O(11) | -1971(8)  | 6873(3) | 1052(3) | 52(1)             |        | 2.07 |
| O(12) | -892(9)   | 6504(3) | -481(3) | 67(1)             |        | 2.18 |

**Table S2** Selected bond lengths (Å) and angles (°) for Li<sub>5</sub>Cs(SO<sub>4</sub>)<sub>3</sub>.

|               |           |                  |            |
|---------------|-----------|------------------|------------|
| Cs(1)-O(9B)#1 | 3.320(10) | S(1)-O(2)        | 1.447(3)   |
| Cs(1)-O(8)    | 3.339(4)  | S(1)-O(1)        | 1.461(3)   |
| Cs(1)-O(8)#2  | 3.352(3)  | S(1)-O(3)        | 1.474(3)   |
| Cs(1)-O(5)#3  | 3.376(3)  | S(1)-O(4)        | 1.478(3)   |
| Cs(1)-O(1)#1  | 3.411(3)  | S(2)-O(11)       | 1.428(4)   |
| Cs(1)-O(11)   | 3.435(4)  | S(2)-O(9B)       | 1.438(13)  |
| Cs(1)-O(2)#1  | 3.481(3)  | S(2)-O(12)       | 1.449(4)   |
| Cs(1)-O(4)    | 3.542(3)  | S(2)-O(10)       | 1.463(4)   |
| Cs(1)-O(9A)   | 3.554(14) | S(2)-O(9A)       | 1.464(11)  |
| Cs(1)-O(2)    | 3.579(4)  | S(3)-O(8)        | 1.453(3)   |
| Cs(1)-O(9B)   | 3.604(18) | S(3)-O(7)        | 1.466(3)   |
| Cs(1)-O(6)    | 3.728(4)  | S(3)-O(6)        | 1.474(3)   |
|               |           | S(3)-O(5)        | 1.481(3)   |
| Li(1)-O(4)    | 1.985(9)  |                  |            |
| Li(1)-O(10)#4 | 1.991(10) | O(2)-S(1)-O(1)   | 109.0(2)   |
| Li(1)-O(5)#3  | 2.038(9)  | O(2)-S(1)-O(3)   | 110.5(2)   |
| Li(1)-O(1)#1  | 2.113(10) | O(1)-S(1)-O(3)   | 108.8(2)   |
| Li(1)-O(12)#5 | 2.608(11) | O(2)-S(1)-O(4)   | 110.2(2)   |
| Li(2)-O(9A)   | 1.817(15) | O(1)-S(1)-O(4)   | 109.57(18) |
| Li(2)-O(9B)   | 1.903(15) | O(3)-S(1)-O(4)   | 108.83(17) |
| Li(2)-O(10)#8 | 1.973(9)  | O(8)-S(3)-O(7)   | 110.50(19) |
| Li(2)-O(8)#2  | 1.983(9)  | O(8)-S(3)-O(6)   | 109.5(2)   |
| Li(2)-O(12)#9 | 2.011(9)  | O(7)-S(3)-O(6)   | 109.21(18) |
| Li(2)-O(9A)#9 | 2.514(17) | O(8)-S(3)-O(5)   | 109.72(19) |
| Li(3)-O(6)    | 1.913(8)  | O(7)-S(3)-O(5)   | 108.65(17) |
| Li(3)-O(1)#10 | 1.916(8)  | O(6)-S(3)-O(5)   | 109.19(18) |
| Li(3)-O(12)#9 | 1.920(9)  | O(11)-S(2)-O(9B) | 102.1(7)   |
| Li(3)-O(5)#2  | 1.962(9)  | O(11)-S(2)-O(12) | 111.6(3)   |
| Li(4)-O(2)    | 1.889(8)  | O(9B)-S(2)-O(12) | 122.1(4)   |
|               |           | O(11)-S(2)-O(10) | 110.4(2)   |
| Li(5)-O(11)   | 1.902(9)  | O(9B)-S(2)-O(10) | 103.1(7)   |
| Li(5)-O(3)#13 | 1.956(9)  | O(12)-S(2)-O(10) | 107.0(2)   |
| Li(5)-O(6)#6  | 1.960(8)  |                  |            |
| Li(5)-O(7)#3  | 1.977(9)  |                  |            |

Symmetry transformations used to generate equivalent atoms:

#1  $x+1, y, z$  #2  $x-1, y, z$  #3  $-x+1, y+1/2, -z+1/2$ #4  $x+1, -y+3/2, z+1/2$  #5  $x, -y+3/2, z+1/2$ #6  $-x, y+1/2, -z+1/2$  #8  $-x-1, -y+1, -z$ #9  $-x, -y+1, -z$  #10  $-x, y-1/2, -z+1/2$ #13  $x, -y+3/2, z-1/2$

**Table S3** Birefringence and cutoff edge comparison for wave plate.

|                                                   | <b>Birefringence</b> | <b>Cutoff Edge(nm)</b> |
|---------------------------------------------------|----------------------|------------------------|
| CaCO <sub>3</sub>                                 | 0.172                | 200                    |
| MgF <sub>2</sub>                                  | 0.0118               | 110                    |
| Al <sub>2</sub> O <sub>3</sub>                    | 0.01                 | 170                    |
| quartz crystals (SiO <sub>2</sub> )               | 0.0059               | 200                    |
| Li <sub>5</sub> Cs(SO <sub>4</sub> ) <sub>3</sub> | 0.0047               | 180                    |

**Table S4** Comparison of basic information on alkali metal sulfates.

| Collection Code | Space group | Formula                               | Type of S-O units          | A:S                      |
|-----------------|-------------|---------------------------------------|----------------------------|--------------------------|
| 2512            | $P2_1/c$    | $\text{Li}_2(\text{SO}_4)$            | Isolated $[\text{SO}_4]$   | 2                        |
| 153806          | $Cmcm$      |                                       | Isolated $[\text{SO}_4]$   | 2                        |
| 37435           | $F-43m$     |                                       | Isolated $[\text{SO}_4]$   | 2                        |
| 201117          | $Fm-3m$     |                                       | Isolated $[\text{SO}_4]$   | 2                        |
| 2895            | $Fddd$      | $\text{Na}_2(\text{SO}_4)$            | Isolated $[\text{SO}_4]$   | 2                        |
| 62516           | $P63/mmc$   |                                       | Isolated $[\text{SO}_4]$   | 2                        |
| 66554           | $Cmcm$      |                                       | Isolated $[\text{SO}_4]$   | 2                        |
| 81504           | $Pbnm$      |                                       | Isolated $[\text{SO}_4]$   | 2                        |
| 27955           | $P-3m$      |                                       | Isolated $[\text{SO}_4]$   | 2                        |
| 31687           | $Pbnn$      |                                       | Isolated $[\text{SO}_4]$   | 2                        |
| 31816           | $P-3$       | $\text{Na}_2(\text{SO}_3)$            | Isolated $[\text{SO}_3]$   | 2                        |
| 44800           | $P6/m$      |                                       | Isolated $[\text{SO}_3]$   | 2                        |
| 60762           | $P-3m$      | $\text{K}_2(\text{SO}_3)$             | Isolated $[\text{SO}_3]$   | 2                        |
| 2827            | $Pnam$      | $\text{K}_2(\text{SO}_4)$             | Isolated $[\text{SO}_4]$   | 2                        |
| 14084           | $P63/mmc$   |                                       | Isolated $[\text{SO}_4]$   | 2                        |
| 31533           | $Pmcn$      |                                       | Isolated $[\text{SO}_4]$   | 2                        |
| 27956           | $P-3m$      |                                       | Isolated $[\text{SO}_4]$   | 2                        |
| 2105            | $Pnam$      | $\text{Rb}_2(\text{SO}_4)$            | Isolated $[\text{SO}_4]$   | 2                        |
| 27462           | $P63/mmc$   |                                       | Isolated $[\text{SO}_4]$   | 2                        |
| 56103           | $Pmcn$      |                                       | Isolated $[\text{SO}_4]$   | 2                        |
| 27463           | $P63/mmc$   | $\text{Cs}_2(\text{SO}_4)$            | Isolated $[\text{SO}_4]$   | 2                        |
| 52382           | $Pnam$      |                                       | Isolated $[\text{SO}_4]$   | 2                        |
| 14364           | $P3_1c$     | $\text{LiNa}(\text{SO}_4)$            | Isolated $[\text{SO}_4]$   | 2                        |
| 20851           | $P63$       | $\text{LiK}(\text{SO}_4)$             | Isolated $[\text{SO}_4]$   | 2                        |
| 71365           | $P3_1c$     |                                       | Isolated $[\text{SO}_4]$   | 2                        |
| 71366           | $Cc$        |                                       | Isolated $[\text{SO}_4]$   | 2                        |
| 151622          | $Pmcn$      |                                       | Isolated $[\text{SO}_4]$   | 2                        |
| 151625          | $P63mc$     |                                       | Isolated $[\text{SO}_4]$   | 2                        |
| 151626          | $P63/mmc$   |                                       | Isolated $[\text{SO}_4]$   | 2                        |
| 280392          | $Pmcn$      |                                       | Isolated $[\text{SO}_4]$   | 2                        |
| 88831           | $Cmc2_1$    |                                       | Isolated $[\text{SO}_4]$   | 2                        |
| 88832           | $P2_1cn$    |                                       | Isolated $[\text{SO}_4]$   | 2                        |
| 174056          | $Pmcn$      |                                       | $\text{LiRb}(\text{SO}_4)$ | Isolated $[\text{SO}_4]$ |
| 174057          | $P2_1/c$    | Isolated $[\text{SO}_4]$              |                            | 2                        |
| 174058          | $Pn$        | Isolated $[\text{SO}_4]$              |                            | 2                        |
| 63179           | $Pmcn$      | $\text{LiCs}(\text{SO}_4)$            | Isolated $[\text{SO}_4]$   | 2                        |
| 63181           | $P2_1/n$    |                                       | Isolated $[\text{SO}_4]$   | 2                        |
| 26014           | $P-3m$      | $\text{K}_3\text{Na}(\text{SO}_4)_2$  | Isolated $[\text{SO}_4]$   | 2                        |
| 77343           | $P-3m$      | $\text{KNa}(\text{SO}_4)$             | Isolated $[\text{SO}_4]$   | 2                        |
| 2102195         | $P2_1/n$    | $\text{Li}_5\text{Cs}(\text{SO}_4)_3$ | Isolated $[\text{SO}_4]$   | 2                        |

|        |               |                                        |                                                                   |      |
|--------|---------------|----------------------------------------|-------------------------------------------------------------------|------|
| 16646  | <i>P2/c</i>   | $\text{Na}_2(\text{S}_2\text{O}_4)$    | Isolated $[\text{SO}_2]$                                          | 1    |
| 59949  | <i>P2_1/n</i> | $\text{Na}_2\text{S}_2\text{O}_5$      | Isolated $[\text{SO}_3]$ and Isolated $[\text{SO}_2]$             | 1    |
| 59950  | <i>P2_1</i>   |                                        | Isolated $[\text{SO}_3]$ and Isolated $[\text{SO}_2]$             | 1    |
| 31817  | <i>P2_1/m</i> | $\text{K}_2\text{S}_2\text{O}_5$       | Isolated $[\text{SO}_3]$ and Isolated $[\text{SO}_2]$             | 1    |
| 188009 | <i>Pnma</i>   | $\text{Li}_2(\text{S}_2\text{O}_7)$    | Isolated $[\text{SO}_3]$ and Isolated $[\text{SO}_2]$             | 1    |
| 413049 | <i>P-1</i>    | $\text{Na}_2(\text{S}_2\text{O}_7)$    | Isolated $[\text{SO}_3]$ and Isolated $[\text{SO}_2]$             | 1    |
| 249741 | <i>C2/c</i>   | $\text{K}_2(\text{S}_2\text{O}_7)$     | Isolated $[\text{SO}_3]$ and Isolated $[\text{SO}_2]$             | 1    |
| 418071 | <i>P-1</i>    | $\text{Cs}_2(\text{S}_2\text{O}_7)$    | Isolated $[\text{SO}_3]$ and Isolated $[\text{SO}_2]$             | 1    |
| 413050 | <i>P-1</i>    | $\text{KNa}(\text{S}_2\text{O}_7)$     | Isolated $[\text{SO}_3]$ and Isolated $[\text{SO}_2]$             | 1    |
| 431359 | <i>C2/c</i>   | $\text{Li}_2(\text{S}_5\text{O}_{16})$ | Isolated $[\text{S}_5\text{O}_{16}]$                              | 0.4  |
| 431363 | <i>Pbcn</i>   | $\text{Na}_2(\text{S}_5\text{O}_{16})$ | Isolated $[\text{S}_5\text{O}_{16}]$                              | 0.4  |
| 26180  | <i>Pbcn</i>   | $\text{K}_2(\text{S}_5\text{O}_{16})$  | Isolated $[\text{S}_5\text{O}_{16}]$                              | 0.4  |
| 428769 | <i>P2_1</i>   | $\text{Cs}_2(\text{S}_5\text{O}_{16})$ | Isolated $[\text{S}_5\text{O}_{16}]$                              | 0.4  |
| 428770 | <i>P2_1/c</i> | $\text{Rb}_2(\text{S}_6\text{O}_{19})$ | Isolated $[\text{S}_4\text{O}_{13}]$ and Isolated $[\text{SO}_2]$ | 0.33 |

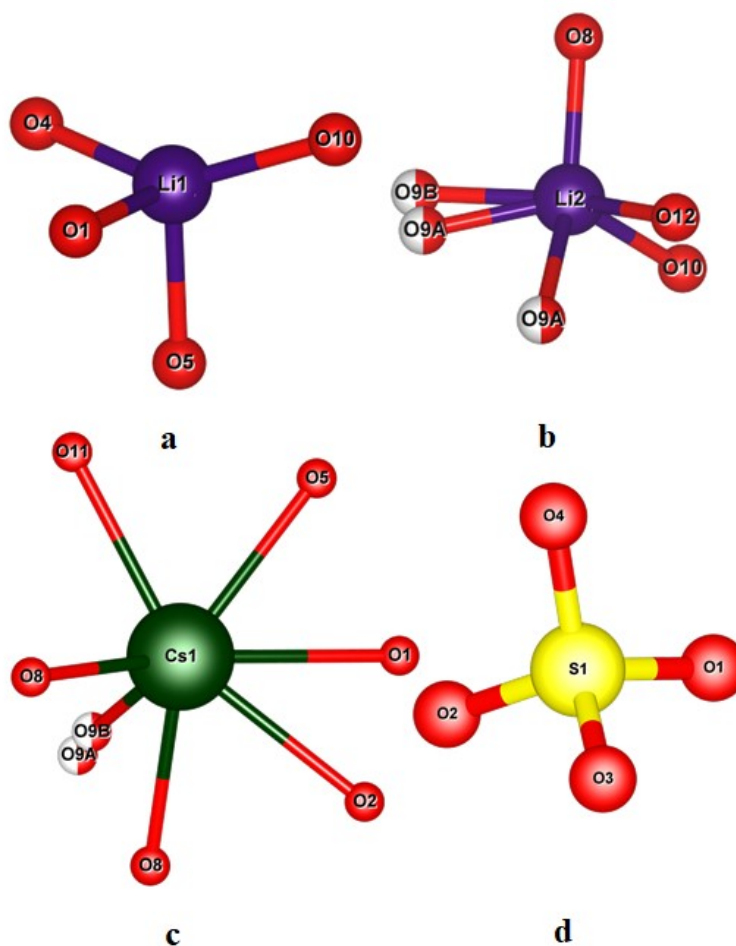

**Figure S1** The coordination environments of cations in the crystal structure of  $\text{Li}_5\text{Cs}(\text{SO}_4)_3$ .

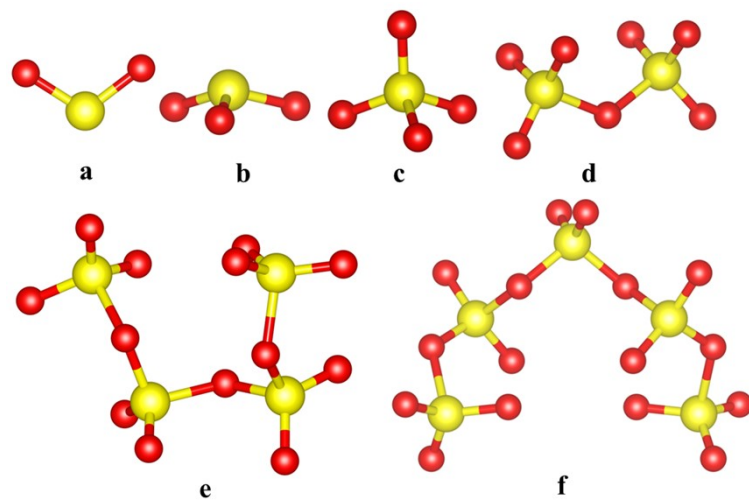

**Figure S2** Basic type of S-O group in alkali metal sulfates. (a)  $\text{SO}_2$ ; (b)  $\text{SO}_3$ ; (c)  $\text{SO}_4$ ; (d)  $\text{S}_2\text{O}_7$ ; (e)  $\text{S}_4\text{O}_{13}$ ; (f)  $\text{S}_5\text{O}_{16}$ .
